# Supplementary material for: Towards a Systems Approach in the Genetic Analysis of Archaea: Accelerating Mutant Construction and Phenotypic Analysis inHaloferax volcanii
Source: Hindawi journal article supplement (doi:10.1155/2010/426239), 2010-01-01
Supplement: f1 [file 426239.f1.pdf]

**Supplemental Table 1 Strains**

| <b>Strain</b>                | <b>Genotype</b>                                                                                                                                                                                                                                                                                                                             | <b>Reference</b> |
|------------------------------|---------------------------------------------------------------------------------------------------------------------------------------------------------------------------------------------------------------------------------------------------------------------------------------------------------------------------------------------|------------------|
| <i>E. coli</i> Top10 DH5a    | F <sup>-</sup> <i>mcrA</i> Δ( <i>mrr-hsdRMS-mcrBC</i> ) φ80 <i>lacZ</i> ΔM15 Δ <i>lacX74</i> <i>recA1</i> <i>araD139</i> Δ( <i>ara-leu</i> ) 7697 <i>galU</i> <i>galK</i> <i>rpsL</i> (Str <sup>R</sup> ) <i>endA1</i> <i>nupG</i> λ-                                                                                                       | Invitrogen, CA   |
| <i>E. coli</i> <i>inv110</i> | F' { <i>tra</i> Δ36 <i>proAB</i> <i>lacI<sub>q</sub></i> <i>lacZ</i> ΔM15} <i>rpsL</i> (Str <sup>R</sup> ) <i>thr</i> <i>leu</i> <i>endA</i> <i>thi-1</i> <i>lacY</i> <i>galK</i> <i>galT</i> <i>ara</i> <i>tonA</i> <i>tsx</i> <i>dam</i> <i>dcm</i> <i>supE44</i> Δ( <i>lac-proAB</i> ) Δ( <i>mcrC-mrr</i> )102::Tn10 (Tet <sup>R</sup> ) | Invitrogen, CA   |
| <i>H. volcanii</i> DS70      |                                                                                                                                                                                                                                                                                                                                             | [5]              |
| <i>H. volcanii</i> H26       | DS70 Δ <i>pyrE2</i>                                                                                                                                                                                                                                                                                                                         | [1]              |
| VDC2177                      | H26 Δ <i>HVO_2736</i>                                                                                                                                                                                                                                                                                                                       | [2]              |
| VDC3226                      | H26 pJAM202c                                                                                                                                                                                                                                                                                                                                | This work        |
| VDC2329                      | H26 Δ <i>HVO_1105</i>                                                                                                                                                                                                                                                                                                                       | This work        |
| VDC2347                      | H26 Δ <i>HVO_0156</i>                                                                                                                                                                                                                                                                                                                       | This work        |
| VDC2364                      | H26 Δ <i>HVO_2493</i>                                                                                                                                                                                                                                                                                                                       | This work        |
| VDC2385                      | H26 Δ <i>HVO_0236</i>                                                                                                                                                                                                                                                                                                                       | This work        |
| VDC2399                      | H26 Δ <i>HVO_B0354</i>                                                                                                                                                                                                                                                                                                                      | This work        |

|         |                                            |           |
|---------|--------------------------------------------|-----------|
| VDC2414 | H26 $\Delta$ HVO_0390                      | This work |
| VDC2452 | H26 $\Delta$ HVO_2888                      | This work |
| VDC2457 | H26 $\Delta$ HVO_0580                      | This work |
| VDC2459 | H26 $\Delta$ HVO_1852                      | This work |
| VDC2469 | H26 $\Delta$ HVO_1475                      | This work |
| VDC2476 | H26 $\Delta$ HVO_2478                      | This work |
| VDC2506 | H26 $\Delta$ HVO_0658                      | This work |
| VDC2514 | H26 $\Delta$ HVO_2744                      | This work |
| VDC2517 | H26 $\Delta$ HVO_0916                      | This work |
| VDC2527 | H26 $\Delta$ HVO_1631                      | This work |
| VDC2545 | H26 $\Delta$ HVO_2906                      | This work |
| VDC3241 | H26 $\Delta$ HVO_2001                      | [2]       |
| VDC3347 | H26 $\Delta$ HVO_1717                      | This work |
| VDC3352 | H26 $\Delta$ HVO_1716                      | This work |
| VDC3259 | H26 $\Delta$ HVO_2001 pJAM202c             | This work |
| VDC3265 | H26 $\Delta$ HVO_2001 pGP109               | This work |
| VDC3414 | H26 $\Delta$ HVO_1105<br>$\Delta$ HVO_2008 | This work |
| VDC5203 | H26 $\Delta$ HVO_2008                      | This work |
| VDC2554 | H26 $\Delta$ HVO_0253 pIKB437              | This work |
| VDC2552 | H26 $\Delta$ HVO_2747 pIKB434              | This work |
| VDC2556 | H26 $\Delta$ HVO_0339 pIKB434              | This work |

**Supplemental Table 2 Plasmids**

| <b>Plasmid</b> | <b>Description</b>                                                            | <b>Reference</b> |
|----------------|-------------------------------------------------------------------------------|------------------|
| pJAM202        | <i>H. volcanii</i> shuttle vector                                             | [3]              |
| pTA131         | Amp <sup>R</sup> ; ColE1                                                      | [1]              |
| pBY158         | pTA131 derivative containing the attCm <sup>R</sup> Ccd <sup>R</sup> cassette | [2]              |
| pBY165.31      | pTA131 $\Delta$ HVO_2001                                                      | [2]              |
| pNAB135        | pTA131 $\Delta$ HVO_2008                                                      | [4]              |
| pGP068         | pBY158 $\Delta$ HVO_2747                                                      | This work        |
| pGP041         | pCR8/GW 1000BpUpDn $\Delta$ HVO_0929                                          | This work        |
| pGP019         | pCR8/GW 1000BpUPDn HVO_0929                                                   | This work        |
| pIKB264        | pTA131 $\Delta$ HVO_1383                                                      | This work        |
| pIKB103        | pTA131 $\Delta$ HVO_2736                                                      | [2]              |
| pIKB154        | pTA131 $\Delta$ HVO_0156                                                      | This work        |
| pIKB156        | pTA131 $\Delta$ HVO_0574                                                      | This work        |
| pIKB162        | pTA131 $\Delta$ HVO_1105                                                      | This work        |
| pIKB172        | pTA131 $\Delta$ HVO_1594                                                      | This work        |
| pIKB180        | pTA131 $\Delta$ HVO_1979                                                      | This work        |
| pIKB184        | pTA131 $\Delta$ HVO_1173                                                      | This work        |
| pIKB199        | pTA131 $\Delta$ HVO_1852                                                      | This work        |

|         |                                                                               |           |
|---------|-------------------------------------------------------------------------------|-----------|
| pIKB203 | pTA131 $\Delta$ HVO_2888                                                      | This work |
| pIKB207 | pTA131 $\Delta$ HVO_1475                                                      | This work |
| pIKB211 | pTA131 $\Delta$ HVO_0697                                                      | This work |
| pIKB215 | pTA131 $\Delta$ HVO_0236                                                      | This work |
| pIKB219 | pTA131 $\Delta$ HVO_2493                                                      | This work |
| pIKB229 | pTA131 $\Delta$ HVO_0339                                                      | This work |
| pIKB240 | pTA131 $\Delta$ HVO_0580                                                      | This work |
| pIKB251 | pTA131 $\Delta$ HVO_2906                                                      | This work |
| pIKB262 | pTA131 $\Delta$ HVO_B0354                                                     | This work |
| pIKB265 | pTA131 $\Delta$ HVO_0253                                                      | This work |
| pIKB268 | pTA131 $\Delta$ HVO_1717                                                      | This work |
| pIKB271 | pTA131 $\Delta$ HVO_3412                                                      | This work |
| pIKB274 | pTA131 $\Delta$ HVO_0390                                                      | This work |
| pIKB276 | pTA131 $\Delta$ HVO_1716                                                      | This work |
| pIKB290 | pTA131 $\Delta$ HVO_1173                                                      | This work |
| pIKB304 | pTA131 $\Delta$ HVO_2478                                                      | This work |
| pIKB315 | pTA131 $\Delta$ HVO_0658                                                      | This work |
| pIKB415 | pTA131 $\Delta$ HVO_1631                                                      | This work |
| pIKB417 | pTA131 $\Delta$ HVO_0916                                                      | This work |
| pIKB418 | pTA131 $\Delta$ HVO_2744                                                      | This work |
| pIKB371 | HVO_0339 inserted<br>between the <i>NdeI</i> <i>BlnI</i> sites<br>of pJAM202c | This work |

|         |                                                                                         |           |
|---------|-----------------------------------------------------------------------------------------|-----------|
| pIKB437 | <i>HVO_0253</i> inserted<br>between the <i>NdeI</i> <i>BlpI</i> sites<br>of pJAM202c    | This work |
| pIKB367 | <i>HVO_1979</i> inserted<br>between the <i>NdeI</i> <i>BlpI</i> sites<br>of pJAM202c    | This work |
| pIKB434 | <i>HVO_2747</i> inserted<br>between the <i>NdeI</i> <i>BlpI</i> sites<br>of pJAM202c    | This work |
| pGP109  | <i>HVO_2001</i> inserted<br>between the <i>NdeI</i> and <i>BlpI</i><br>sites of pJAM202 | This work |

**Supplemental Table 3 Oligonucleotides**

| Oligonucleotide                            | Sequence                             | Purpose                                                                 |
|--------------------------------------------|--------------------------------------|-------------------------------------------------------------------------|
| <b>Deletion constructs using In-fusion</b> |                                      |                                                                         |
| HVO_1631_NF                                | cgggccccccctcgaggaggaagaccgtcgaaacc  | Construction<br>of <i>HVO_1631</i><br>deletion<br>construct,<br>pIKB415 |
| HVO_1631_NR                                | gacgcgttcatatgcgttcacaagccgatgct     |                                                                         |
| HVO_1631_CF                                | gcatatgaacgcgtctcgacgatctgttcgagttc  |                                                                         |
| HVO_1631_CR                                | cgggctgcaggaattcgtaatcgcgcctgactg    |                                                                         |
| HVO_0916_NF                                | cgggccccccctcgagcatcgaatcactcggctaca | Construction<br>of <i>HVO_0916</i>                                      |
| HVO_0916_NR                                | gacgcgttcatatgcgtccaccacgtcgaagc     |                                                                         |

|                |                                     |                       |
|----------------|-------------------------------------|-----------------------|
| HVO_0916_CF    | gcatatgaacgcgtccctcccgccttcgac      | deletion              |
| HVO_0916_CR    | cgggctgcaggaattcaggatgccgccttcgag   | construct,<br>pIKB417 |
| HVO_2744_NF    | cgggccccctcgagacggcgtcgaggaactc     | Construction          |
| HVO_2744_NR    | gacgcgttcatatgcgaggtcgtcgttcaggagtc | of <i>HVO_2744</i>    |
| HVO_2744_CF    | gcatatgaacgcgtcggctgtagaccgaggtgtt  | deletion              |
| HVO_2744_CR    | cgggctgcaggaattctctcccaccgttcgaaat  | construct,<br>pIKB418 |
| HVO_2478_N_Fwd | cgggccccctcgaggaactgcgggcgaag       | Construction          |
| HVO_2478_N_Rev | gacgcgttcatatgccgacgaaagcgaggtgtc   | of <i>HVO_2478</i>    |
| HVO_2478_C_Fwd | gcatatgaacgcgtcgtcgtcaggctcgcaacg   | deletion              |
| HVO_2478_C_Rev | cgggctgcaggaattcgtccacatcactgcacct  | construct,<br>pIKB304 |
| HVO_1716_N_Fwd | cgggccccctcgagcgcgacgactaccactg     | Construction of       |
| HVO_1716_N_Rev | gacgcgttcatatgcgacgtgggttcggtagtca  | <i>HVO_1716</i>       |
| HVO_1716_C_Fwd | gcatatgaacgcgtcgcgacccgattccgta     | deletion              |
| HVO_1716_C_Rev | cgggctgcaggaattcgttctcgaaggcgaag    | construct,<br>pIKB276 |
| HVO_1717_N_Fwd | cgggccccctcgaggagcgacctagaacgacacc  | Construction          |
| HVO_1717_N_Rev | gacgcgttcatatgcgcgaacagctcgtttatcg  | of <i>HVO_1717</i>    |
| HVO_1717_C_Fwd | gcatatgaacgcgtccgactccacgtcgacctct  | deletion              |
| HVO_1717_C_Rev | cgggctgcaggaattctcgaaggcgtcgaagaact | construct,<br>pIKB268 |

|                     |                                       |                                                                         |
|---------------------|---------------------------------------|-------------------------------------------------------------------------|
| HVO_339_N_IfKO_Fwd  | cgggccccccctcgagtcgaggctcacgtacgtcc   | Construction<br>of <i>HVO_339</i><br>deletion<br>construct,<br>pIKB229  |
| HVO_339_N_IfKO_Rev  | gacgcgttcatatgccgccagataggtcgtacaca   |                                                                         |
| HVO_339_C_IfKO_Fwd  | gcatatgaacgcgtcatcgttaagccgctcgtt     |                                                                         |
| HVO_339_C_IfKO_Rev  | cgggctgcaggaattcacggccatgctcgatatgt   |                                                                         |
| HVO_1475_N_IfKO_Fwd | cgggccccccctcgagagtcgacgacgaccaaac    | Construction<br>of <i>HVO_1475</i><br>deletion<br>construct,<br>pIKB207 |
| HVO_1475_N_IfKO_Rev | gacgcgttcatatgcagttcactccacgacgag     |                                                                         |
| HVO_1475_C_IfKO_Fwd | gcatatgaacgcgtcggctactgttcgagcgagacct |                                                                         |
| HVO_1475_C_IfKO_Rev | cgggctgcaggaattcgaaccaccccgtagatta    |                                                                         |
| HVO_0697_N_IfKO_Fwd | cgggccccccctcgagccctggaggctgactacg    | Construction<br>of <i>HVO_0697</i><br>deletion<br>construct,<br>pIKB211 |
| HVO_0697_N_IfKO_Rev | gacgcgttcatatgctcaggagatgcaacagcaac   |                                                                         |
| HVO_0697_C_IfKO_Fwd | gcatatgaacgcgtccagccctcgatgaggac      |                                                                         |
| HVO_0697_C_IfKO_Rev | cgggctgcaggaattcgtcccctacgtcaacgtcac  |                                                                         |
| HVO_0253_N_IfKO_Fwd | cgggccccccctcgaggtaacgcggagtcttg      | Construction<br>of <i>HVO_0253</i><br>deletion<br>construct,<br>pIKB265 |
| HVO_0253_N_IfKO_Rev | gacgcgttcatatgcgtctcggtcgggtagacg     |                                                                         |
| HVO_0253_C_IfKO_Fwd | gcatatgaacgcgtcgacatcgaggcgtggttaga   |                                                                         |
| HVO_0253_C_IfKO_Rev | cgggctgcaggaattcgtcgcgcacaaactcgtc    |                                                                         |
| HVO_0236_N_IfKO_Fwd | cgggccccccctcgaggtagccgtgtgcttacaga   | Construction<br>of <i>HVO_0236</i><br>deletion                          |
| HVO_0236_N_IfKO_Rev | gacgcgttcatatgccctgtgtggggttagaaga    |                                                                         |
| HVO_0236_C_IfKO_Fwd | gcatatgaacgcgtcgtcgatagatcgcgaggtgac  |                                                                         |

|                     |                                      |                                                |
|---------------------|--------------------------------------|------------------------------------------------|
| HVO_0236_C_IfKO_Rev | cgggctgcaggaattcgcgagagcagttggagaaac | construct,<br>pIKB215                          |
| HVO_2493_N_IfKO_Fwd | cgggccccctcgagcagagagcgacagttgacga   | Construction<br>of <i>HVO_2493</i><br>deletion |
| HVO_2493_N_IfKO_Rev | gacgcgttcatatgccgtctgtctggcgaact     |                                                |
| HVO_2493_C_IfKO_Fwd | gcatatgaacgcgtcgttctgcaggtgacgac     |                                                |
| HVO_2493_C_IfKO_Rev | cgggctgcaggaattcgcacccagcatggatattgt | construct,<br>pIKB219                          |
| HVO_574_N_IfKO_Fwd  | cgggccccctcgagcgcagggcagcagttc       | Construction<br>of <i>HVO_0574</i><br>deletion |
| HVO_574_N_IfKO_Rev  | gacgcgttcatatgcgatttcggtcatctcgggta  |                                                |
| HVO_574_C_IfKO_Fwd  | gcatatgaacgcgtccgaggatgcgctcgac      |                                                |
| HVO_574_C_IfKO_Rev  | cgggctgcaggaattcgcgcagggcaacctc      | construct,<br>pIKB156                          |
| HVO_1979_N_IfKO_Fwd | cgggccccctcgagccgacgatggcgtgtt       | Construction<br>of <i>HVO_1979</i><br>deletion |
| HVO_1979_N_IfKO_Rev | gacgcgttcatatgcaggacgagccgttcgag     |                                                |
| HVO_1979_C_IfKO_Fwd | gcatatgaacgcgtcagacagggcgtcagacc     |                                                |
| HVO_1979_C_IfKO_Rev | cgggctgcaggaattccggagaacagaagcgagaag | construct,<br>pIKB180                          |
| HVO_1105_N_IfKO_Fwd | cgggccccctcgagggccatgccgtagagacc     | Construction<br>of <i>HVO_1105</i><br>deletion |
| HVO_1105_N_IfKO_Rev | gacgcgttcatatgcccggaggtcgtccaaatc    |                                                |
| HVO_1105_C_IfKO_Fwd | gcatatgaacgcgtccgaggacgaagagtgag     |                                                |
| HVO_1105_C_IfKO_Rev | cgggctgcaggaattcagagaacgctgggcgaag   | construct,<br>pIKB162                          |
| HVO_1383_N_IfKO_Fwd | cgggccccctcgagagccgacgccgacac        | Construction                                   |

|                     |                                     |                       |
|---------------------|-------------------------------------|-----------------------|
| HVO_1383_N_IfKO_Rev | gacgcgttcatatgcccgtggacgaggagtatcac | of <i>HVO_1383</i>    |
| HVO_1383_C_IfKO_Fwd | gcatatgaacgcgtccaccggctacctcgtgtt   | deletion              |
| HVO_1383_C_IfKO_Rev | cgggctgcaggaattccgtggcgtttctgttc    | construct,<br>pIKB    |
| HVO_0658_N_IfKO_Fwd | cgggccccctcgagcgtcgtggccatcttc      | Construction          |
| HVO_0658_N_IfKO_Rev | gacgcgttcatatgcgacgacctcgtcttcgactt | of <i>HVO_0658</i>    |
| HVO_0658_C_IfKO_Fwd | gcatatgaacgcgtccgcacgcggaagtct      | deletion              |
| HVO_0658_C_IfKO_Rev | cgggctgcaggaattccacgagcgcgacgac     | construct,<br>pIKB315 |
| HVO_1173_N_IfKO_Fwd | cgggccccctcgagagcttgaggagccgtagat   | Construction          |
| HVO_1173_N_IfKO_Rev | gacgcgttcatatgcgacgtgcgtcgtcatcc    | of <i>HVO_1173</i>    |
| HVO_1173_C_IfKO_Fwd | gcatatgaacgcgtcccgaaaaccgggtggt     | deletion              |
| HVO_1173_C_IfKO_Rev | cgggctgcaggaattcgaggtcgtcgttgcctc   | construct,<br>pIKB265 |
| HVO_1852_N_IfKO_Fwd | cgggccccctcgaggcgcgtcgtgatgtg       | Construction          |
| HVO_1852_N_IfKO_Rev | gacgcgttcatatgcatccgcgaggagtcg      | of <i>HVO_1852</i>    |
| HVO_1852_C_IfKO_Fwd | gcatatgaacgcgtccggctgcgtggaac       | deletion              |
| HVO_1852_C_IfKO_Rev | cgggctgcaggaattcgttccgccctcgtta     | construct,<br>pIKB199 |
| HVO_2906_N_IfKO_Fwd | cgggccccctcgagcgcacaccgtactttctcca  | Construction          |
| HVO_2906_N_IfKO_Rev | gacgcgttcatatgcgctgacgggcgtgttc     | of <i>HVO_2906</i>    |
| HVO_2906_C_IfKO_Fwd | gcatatgaacgcgtcccggtgttgccgtatc     | deletion              |
| HVO_2906_C_IfKO_Rev | cgggctgcaggaattccgagatattcaccgacgag | construct,            |

|                     |                                     |                                                                         |
|---------------------|-------------------------------------|-------------------------------------------------------------------------|
|                     |                                     | pIKB251                                                                 |
| HVO_0156_N_IfKO_Fwd | cgggccccccctcgagagcgacatcgaactctcg  | Construction<br>of <i>HVO_0156</i><br>deletion<br>construct,<br>pIKB154 |
| HVO_0156_N_IfKO_Rev | gacgcgttcatatgcgtgcggtacgtgcatctg   |                                                                         |
| HVO_0156_C_IfKO_Fwd | gcatatgaacgcgtccccgaccagttcgacgac   |                                                                         |
| HVO_0156_C_IfKO_Rev | cgggctgcaggaattccgagagtggaactcgagtc |                                                                         |
| HVO_1594_N_IfKO_Fwd | cgggccccccctcgaggatgcccagaggaacac   | Construction<br>of <i>HVO_1594</i><br>deletion<br>construct,<br>pIKB172 |
| HVO_1594_N_IfKO_Rev | gacgcgttcatatgcaaaaaggcctcctcgtcgt  |                                                                         |
| HVO_1594_C_IfKO_Fwd | gcatatgaacgcgtccgtctaccgcaccacaac   |                                                                         |
| HVO_1594_C_IfKO_Rev | cgggctgcaggaattctattccggttgacgaggtc |                                                                         |
| HVO_2747_N_IfKO_Fwd | cgggccccccctcgagccgaactcctttggaacat | Construction<br>of <i>HVO_2747</i><br>deletion<br>construct,<br>pGP035  |
| HVO_2747_N_IfKO_Rev | gacgcgttcatatgcgaaggaggtcatcgtcgag  |                                                                         |
| HVO_2747_C_IfKO_Fwd | gcatatgaacgcgtcgtggcggagtacgtcgag   |                                                                         |
| HVO_2747_C_IfKO_Rev | cgggctgcaggaattccgcttaacggtctcacc   |                                                                         |
| ORF02092_N_IfKO_Fwd | cgggccccccctcgagcgacggcgagcagttc    | Construction<br>of <i>HVO_2888</i><br>deletion<br>construct,<br>pIKB207 |
| ORF02092_N_IfKO_Rev | gacgcgttcatatgcgatttcggtcatctcgggta |                                                                         |
| ORF02092_C_IfKO_Fwd | gcatatgaacgcgtccgaggatgcgctcgac     |                                                                         |
| ORF02092_C_IfKO_Rev | cgggctgcaggaattcgcgcaggegaacctc     |                                                                         |
| HVO_580_N_IfKO_Fwd  | cgggccccccctcgagcgccgttccggagctt    | Construction<br>of <i>HVO_0580</i>                                      |
| HVO_580_N_IfKO_Rev  | gacgcgttcatatgcgcacttgcgactccatt    |                                                                         |

|                                                                            |                                      |                                   |
|----------------------------------------------------------------------------|--------------------------------------|-----------------------------------|
| HVO_580_C_IfKO_Fwd                                                         | gcatatgaacgcgctcggaagtgccgactcatcg   | deletion                          |
| HVO_580_C_IfKO_Rev                                                         | cgggctgcaggaattcgtggcctcgtccacatcac  | construct,<br>pIKB240             |
| HVO_B0357_N_Fwd                                                            | cgggccccctcgagagcgcgaggtcgtactcc     | Construction                      |
| HVO_B0357_N_Rev                                                            | gacgcgttcatatgcccgcgaggaacactacgg    | of                                |
| HVO_B0357_C_Fwd                                                            | gcatatgaacgcgctccgtgatgactgagggtga   | <i>HVO_B0357</i>                  |
| HVO_B0357_C_Rev                                                            | cgggctgcaggaattccgacgactggtacgagaaca | deletion<br>construct,<br>pIKB262 |
| HVO_0339_N_Fwd                                                             | cgggccccctcgagtctatctccaccggtccttg   | Construction                      |
| HVO_0339_N_Rev                                                             | gacgcgttcatatgvcgaggacttgacctcatac   | of <i>HVO_0390</i>                |
| HVO_0339_C_For                                                             | gcatatgaacgcgctccgacgacctcttcgagttct | deletion                          |
| HVO_0339_C_Rev                                                             | cgggctgcaggaattcgtgacgaacgtcggact    | construct,<br>pIKB274             |
| <b>Deletion constructs, synthesised using methods other than In-Fusion</b> |                                      |                                   |
| tgtA2HvUPF                                                                 | tctagaggtgattaccacgcgcaag            | Construction                      |
| tgtA2HvUPR                                                                 | ggatccgcgtgaacctcgaagtagt            | of <i>HVO_2008</i>                |
| tgtA2HvDSol1                                                               | aatggatcctcgaagggttaattcgg           | deletion                          |
| tgtA2HvDSol2                                                               | aatgcggccgcaagcttcggcagtcgcgtgttgatg | plasmid,<br>described in<br>[4]   |
|                                                                            |                                      |                                   |
| UpDn_HVOB2736_fwd                                                          | ctg gag gat gtc gcc ctc gc           | Construction                      |

|                                   |                         |                                                                   |
|-----------------------------------|-------------------------|-------------------------------------------------------------------|
| UpDn_HVO2736_rev                  | gac ggt cag gtg cgc ccc | of <i>HVO_2736</i><br>deletion<br>plasmid,<br>described in<br>[2] |
| RevPCR_HVO2736_fwd                | gacgcggccccgcaggaa      |                                                                   |
| RevPCR_HVO2736_rev                | ttcggatcaggatggatac     |                                                                   |
| <b>Gene deletion verification</b> |                         |                                                                   |
| HVO_2478_Int_Fwd                  | gaggtactcggtcgctgtct    | Internal<br>checks for<br><i>HVO_2478</i>                         |
| HVO_2478_Int_Rev                  | ggattccctcgacgagttc     |                                                                   |
| HVO_2478_Ext_Fwd                  | acgtcgtacagcgtgcatc     | External<br>checks for<br><i>HVO_2478</i>                         |
| HVO_2478_Ext_Rev                  | gacgtggacaccgtcctct     |                                                                   |
| HVO_1105_Int_F                    | ccgacgcagacatcgaact     | Internal<br>checks for<br><i>HVO_1105</i>                         |
| HVO_1105_Int_R                    | ccgtctgaaagtcgagcatc    |                                                                   |
| HVO_1105_fwd                      | gcactgttgaacgacctct     | External<br>checks for<br><i>HVO_1105</i>                         |
| HVO_1105_rev                      | ctgtcggagcgaaaagagac    |                                                                   |
| HVO_B0357_Int_F                   | aggtcgtacgtctcgttcgt    | Internal<br>checks for<br><i>HVO_B0357</i>                        |
| HVO_B0357_Int_R                   | ggtcgggctgtacttctca     |                                                                   |
| HVO_B0357_Ext_F                   | cggacagtcgtatgtgcaac    | External<br>checks for                                            |
| HVO_B0357_Ext_R                   | cgacgactggtacgagaaca    |                                                                   |

|                  |                       |                               |
|------------------|-----------------------|-------------------------------|
|                  |                       | <i>HVO_B0357</i>              |
| HVO_1594_int_Fwd | gcatcctggaactcgaagac  | Internal                      |
| HVO_1594_int_Rev | aggtgcaggtggagtagacg  | checks for<br><i>HVO_1594</i> |
| HVO_1594_ext_Fwd | cggcttaaactgtagactgc  | External                      |
| HVO_1594_ext_Rev | ggactcagttcgatgacgttc | checks for<br><i>HVO_1594</i> |
| HVO_0253_Int_F   | aacgcgtcttcgacatcaa   | Internal                      |
| HVO_0253_Int_R   | gtcgtcgtgctcgtctaacc  | checks for<br><i>HVO_0253</i> |
| HVO_0253_Ext_F   | cgggaccggaattaagagtt  | External                      |
| HVO_0253_Ext_R   | tgccatgtcagtaagccaag  | checks for<br><i>HVO_0253</i> |
| HVO_2493_Int_Fwd | cgcttttgaggctgtggag   | Internal                      |
| HVO_2493_Int_Rev | cgaaggctcgaagagtagc   | checks for<br><i>HVO_2493</i> |
| HVO_2493_Ext_Fwd | gttcctcggtactccgtct   | External                      |
| HVO_2493_Ext_Rev | gcctctgacagcagcaaata  | checks for<br><i>HVO_2493</i> |
| HVO_1173_int_Fwd | gggtcatcctaccggacaac  | Internal                      |
| HVO_1173_int_Rev | gccgggacgactttcttg    | checks for<br><i>HVO_1173</i> |
| HVO_1173_Ext_fwd | gcgataccgacgaggagtc   | External                      |

|                  |                      |                               |
|------------------|----------------------|-------------------------------|
| HVO_1173_Ext_rev | ggtcctcgtagcagtccatc | checks for<br><i>HVO_1173</i> |
| HVO_1852_Int_F   | cgaactcgacttccgggta  | Internal                      |
| HVO_1852_Int_R   | gtgtcccgactggtgtacg  | checks for<br><i>HVO_1852</i> |
| HVO_1852_Ext_fwd | gagtacctcggcctcctctc | External                      |
| HVO_1852_Ext_rev | ctccaactcaggagcgaaag | checks for<br><i>HVO_1852</i> |
| HVO_2888_Int_F   | cggaagtctccagacacat  | Internal                      |
| HVO_2888_Int_R   | tcgaacagcttcgacacatc | checks for<br><i>HVO_2888</i> |
| HVO_2888_Ext_fwd | gaagtccaagtgggcgacta | External                      |
| HVO_2888_Ext_rev | ctcggctacgagacgaagag | checks for<br><i>HVO_2888</i> |
| HVO_0580_Int_Fwd | ctctaccgagagttcacc   | Internal                      |
| HVO_0580_Int_Rev | accggaacttctccagtt   | checks for<br><i>HVO_0580</i> |
| HVO_0580_Fwd     | ttcgcgatatgctcaatgaa | External                      |
| HVO_0580_Rev     | cgcggtagagttcggagtag | checks for<br><i>HVO_0580</i> |
| HVO_0339_Int_F   | ctctaccgagagttcacc   | Internal                      |
| HVO_0339_Int_R   | accggaacttctccagtt   | checks for<br><i>HVO_0339</i> |

|                  |                       |                                           |
|------------------|-----------------------|-------------------------------------------|
| HVO_0339_Ext_F   | gttcatgccgtttctgact   | External<br>checks for<br><i>HVO_0339</i> |
| HVO_0339_Ext_R   | cgacagtcacgtgaaatcg   |                                           |
| HVO_0697_Int_F   | gttgctgttgcatctcctga  | Internal<br>checks for<br><i>HVO_0697</i> |
| HVO_0697_Int_R   | ctaccacctcaccgacacct  |                                           |
| HVO_0697_Ext_F   | cccgacgtagtgtccatct   | External<br>checks for<br><i>HVO_0697</i> |
| HVO_0697_Ext_R   | gacaagccgacgaagaagac  |                                           |
| HvO_1383_Int_F   | cggacctctcaaccacttc   | Internal<br>checks for<br><i>HVO_1383</i> |
| HvO_1383_Int_R   | tcgttgaagtcacatctgctg |                                           |
| HvO_1383_Ext_fwd | gctagcacggctcctacaac  | External<br>checks for<br><i>HVO_1383</i> |
| HvO_1383_Ext_rev | cggctgtgaactcctcttttc |                                           |
| HVO_0156_Int_Fwd | ggtacttgacgaagccgaag  | Internal<br>checks for<br><i>HVO_0156</i> |
| HVO_0156_Int_Rev | acgctgtccaaggagttcag  |                                           |
| HVO_0156_Ext_Fwd | gatgcagcagatgcacgta   | External<br>checks for<br><i>HVO_0156</i> |
| HVO_0156_Ext_Rev | gacgtgagaggactcacc    |                                           |
| HVO_0658_Int_fwd | gtggagaccgactgtgtgg   | Internal<br>checks for                    |
| HVO_0658_Int_rev | cgaactcgactcgctgaac   |                                           |

|                  |                      |                               |
|------------------|----------------------|-------------------------------|
|                  |                      | <i>HVO_0658</i>               |
| HVO_0658_Ext_fwd | gttcgggtggatacaggaga | External                      |
| HVO_0658_Ext_rev | agaactcgtggaggattgc  | checks for<br><i>HVO_0658</i> |
| HVO_0236_Int_Fwd | caacgccctcatgtacgac  | Internal                      |
| HVO_0236_Int_Rev | ccgaagtctctgtcacctc  | checks for<br><i>HVO_0236</i> |
| HVO_0236_Ext_fwd | cggaccggaacatctcag   | External                      |
| HVO_0236_Ext_rev | gtacgagcataccgttcgt  | checks for<br><i>HVO_0236</i> |
| HVO_2906_Int_FWD | gagcaactcgtcgaaaaagc | Internal                      |
| HVO_2906_Int_Rev | acttcggcatctacgacctc | checks for<br><i>HVO_2906</i> |
| HVO_2906_Ext_fwd | agttcttgcggttgatggag | External                      |
| HVO_2906_Ext_rev | gacaccgagtcttcgacctc | checks for<br><i>HVO_2906</i> |
| HVO_1594_Int_Fwd | gcatcctggaactcgaagac | Internal                      |
| HVO_1594_Int_Rev | aggtgcaggtggagtagacg | checks for<br><i>HVO_1594</i> |
| HVO_1594_Ext_Fwd | ttcagcgaaccagacgctac | External                      |
| HVO_1594_Ext_Rev | cggcttttgattgggactg  | checks for<br><i>HVO_1594</i> |
| HVO_1475_int_Fwd | aactccttgctcccttcgtt | Internal                      |

|                  |                      |                               |
|------------------|----------------------|-------------------------------|
| HVO_1475_int_Rev | gtctcgctcgaacagtaccc | checks for<br><i>HVO_1475</i> |
| HVO_1475_Ext_fwd | gacgtgacagtcgaggtggt | External                      |
| HVO_1475_Ext_rev | agtacgcgtggagccactac | checks for<br><i>HVO_1475</i> |
| HVO_0574_Int_Fwd | agttcccgctggagacagt  | Internal                      |
| HVO_0574_Int_Rev | cgaagtcgagtcgttcgtc  | checks for<br><i>HVO_0574</i> |
| HVO_0574_Ext_fwd | agtccgagcctcgaagagtt | External                      |
| HVO_0574_Ext_rev | aggacagtcgcaagtccagt | checks for<br><i>HVO_0574</i> |
| HVO_1631_Int_Fwd | aggacctgtccctcgtaggt | Internal                      |
| HVO_1631_Int_Rev | aacagatcgtcgaagccatc | checks for<br><i>HVO_1631</i> |
| HVO_1631_Ext_Fwd | gctacctgtgccctgaatgt | External                      |
| HVO_1631_Ext_Rev | gggaactcctgtgcgataga | checks for<br><i>HVO_1631</i> |
| HVO_0916_Int_Fwd | ctcccagtcgaccttgatgt | Internal                      |
| HVO_0916_Int_Rev | tcgcggagttctacacgag  | checks for<br><i>HVO_0916</i> |
| HVO_0916_Ext_Fwd | cgtccacaagagctacatcg | External                      |
| HVO_0916_Ext_Rev | gggtaatctcacgcaatggt | checks for<br><i>HVO_0916</i> |

|                  |                       |                                           |
|------------------|-----------------------|-------------------------------------------|
| HVO_2744_Int_Fwd | tcgtagccggtgaagctact  | Internal<br>checks for<br><i>HVO_2744</i> |
| HVO_2744_Int_Rev | gggatgaacacctcggctcta |                                           |
| HVO_2744_Ext_Fwd | gtcttcgaccagcgtgttct  | External<br>checks for<br><i>HVO_2744</i> |
| HVO_2744_Ext_Rev | gtgcgcccgtggatagac    |                                           |
| HvO_0253_Ext_F   | cgggaccggaattaagagtt  | External<br>checks for<br><i>HVO_0253</i> |
| HvO_0253_Ext_R   | tgccatgtcagtaagccaag  |                                           |
| HvO_0253_Int_F   | aacgcgtcttcgacatcaa   | Internal<br>checks for<br><i>HVO_0253</i> |
| HvO_0253_Int_R   | gtcgtcgtgctcgtctaacc  |                                           |
| HVO_1979_Ext_Fwd | cgacgattctcgaagctgat  | External<br>checks for<br><i>HVO_1979</i> |
| HVO_1979_Ext_Rev | gtcgagcaggacgaagtagg  |                                           |
| HVO_1979_Int_Fwd | gggtgtactgctcgatggtc  | Internal<br>checks for<br><i>HVO_1979</i> |
| HVO_1979_Int_Rev | gtgcagttcctcctcgacat  |                                           |
| HVO_2747_Int_Fwd | aaaagtcccgttccgctact  | Internal<br>checks for<br><i>HVO_2747</i> |
| HVO_2747_Int_Rev | acgaaatcctcaacgtcgtc  |                                           |
| HVO_2747_Ext_Fwd | gcgaggttcgattcgaggtc  | External<br>checks for                    |
| HVO_2747_Ext_Rev | tcgaggcgaggcgaagagc   |                                           |

|                         |                             |                                 |
|-------------------------|-----------------------------|---------------------------------|
|                         |                             | <i>HVO_2747</i>                 |
| HVO_1717_Ext_Fwd        | tcgcgcaccgcaatgagctt        | External<br>checks for          |
| HVO_1717_Ext_Rev        | aggttctggaacgcctgcaa        | <i>HVO_1717</i>                 |
| HVO_1717_Int_Fwd        | acgagctgttcgcgtcgctt        | Internal<br>checks for          |
| HVO_1717_Int_Rev        | acacgtcgtgtcgcggatt         | <i>HVO_1717</i>                 |
| HVO_1716_Ext_Fwd        | gccgtcgtgctcgaagagaa        | External<br>checks for          |
| HVO_1716_Ext_Rev        | ggcgactctgctcacctact        | <i>HVO_1716</i>                 |
| HVO_1717_Int_Fwd        | acgaactctacgcgtccac         | Internal<br>checks for          |
| HVO_1717_Int_Rev        | ggcgactctgctcacctact        | <i>HVO_1716</i>                 |
| HVO_0929_Int_Fwd        | tgctcgtcggcgactcgacc        | External<br>checks for          |
| HVO_0929_Int_Rev        | tcgcgaacgtcgcctgaat         | <i>HVO_0929</i>                 |
| HVO_0929_Ext_Fwd        | gaataaaaccgaaccgggtcgc      | External<br>checks for          |
| HVO_0929_Ext_Rev        | ggcatcgcgaaggaaatcaac       | <i>HVO_0929</i>                 |
| <b>pJAM202c cloning</b> |                             |                                 |
| HVO_0253_NdeI_Fwd       | atgccatatgatgagcgcacgactaca | Cloning of                      |
| HVO_0253_BlnI_Rev       | atgcgctgagttacgcgtcgtcgtgct | <i>HVO_0253</i><br>into pJAM202 |

|                   |                                      |                                 |
|-------------------|--------------------------------------|---------------------------------|
|                   |                                      |                                 |
| Hvo_2747_ndeI_fwd | atgccatatgatgacacgtacggagagcgg       | Cloning                         |
| Hvo_2747_blpI_rev | atgcgctgagcctgtccgtcgcgtccgacga      | <i>HVO_2747</i><br>into pJAM    |
|                   |                                      |                                 |
| HVO_0339_NdeI_Fwd | atgccatatgatgaccgtcatcggcctcga       | Cloning of                      |
| HVO_0339_BlpI_Rev | atgcgctgagtcagcgtccgggtgcgt          | <i>HVO_0339</i><br>into pJAM202 |
|                   |                                      |                                 |
| Hvo697_fwd        | atgccatatgatggacgacatcgaatcga        | Cloning of                      |
| Hvo697_rev        | atgcgctgagtcagccgatgtaccggaggt       | <i>HVO_0697</i><br>into pJAM202 |
|                   |                                      |                                 |
| HVO_1979_NdeI_Fwd | atgccatatgatgccatatgatgagcatccttgagg | Cloning of                      |
| HVO_1979_BlpI_Rev | atgcgctgagatgcgctcagctcagtcctgaagaa  | <i>HVO_1979</i><br>into pJAM202 |
|                   |                                      |                                 |
| HVO_2001_Fwd      | gctcagctacgtcgggtgaacctaaaga         | Cloning of                      |
| HVO_2001_Rev      | catatgcgcgaccacttcgaactc             | <i>HVO_2001</i><br>into pJAM202 |

**Supplemental Table 4 Salt and temperature tolerance of tested deletion mutants**

**26°C**

| <b>Strain</b>    | <b>12%</b> | <b>14%</b> | <b>16%</b> | <b>18%</b> | <b>23%</b> | <b>25%</b> |
|------------------|------------|------------|------------|------------|------------|------------|
| <b>H26</b>       | +          | +          | +          | +          | -          | -          |
| <i>HVO_0916</i>  | -          | -          | -          | -          | -          | -          |
| <i>HVO_1631</i>  | -          | -          | -          | -          | -          | -          |
| <i>HVO_2477</i>  | +          | ++         | ++         | ++         | -          | -          |
| <i>HVO_2493</i>  | +          | +          | +          | +          | -          | -          |
| <i>HVO_1105</i>  | +          | +          | +          | +          | -          | -          |
| <i>HVO_1105</i>  | +          | +          | +          | +          | -          | -          |
| <i>HVO_2008</i>  |            |            |            |            |            |            |
| <i>HVO_2001</i>  | -          | -          | -          | -          | -          | -          |
| <i>HVO_2008</i>  | +          | +          | +          | +          | -          | -          |
| <i>HVO_1717</i>  | +          | +          | +          | +          | -          | -          |
| <i>HVO_1716</i>  | +          | +          | +          | +          | -          | -          |
| <i>HVO_0253</i>  | +          | +          | +          | +          | -          | -          |
| <i>HVO_1803</i>  | +          | +          | +          | +          | -          | -          |
| <i>HVO_B0354</i> | +          | +          | +          | +          | -          | -          |
| <i>HVO_1594</i>  | +          | +          | +          | +          | -          | -          |
| <i>HVO_0390</i>  | +          | +          | +          | +          | -          | -          |
| <i>HVO_2888</i>  | +          | +          | +          | +          | -          | -          |
| <i>HVO_1378</i>  | +          | +          | +          | +          | -          | -          |
| <i>HVO_1852</i>  | +          | +          | +          | +          | -          | -          |

|                 |   |   |   |   |   |   |
|-----------------|---|---|---|---|---|---|
| <i>HVO_0658</i> | + | + | + | + | - | - |
| <i>HVO_2478</i> | + | + | + | + | - | - |
| <i>HVO_2736</i> | + | + | + | + | - | - |
| <i>HVO_1475</i> | + | + | + | + | - | - |
| <i>HVO_0236</i> | + | + | + | + | - | - |

30°C

| <b>Strain</b>    | <b>12%</b> | <b>14%</b> | <b>16%</b> | <b>18%</b> | <b>23%</b> | <b>25%</b> |
|------------------|------------|------------|------------|------------|------------|------------|
| <b>H26</b>       | ++         | ++         | ++         | ++         | -          | -          |
| <i>HVO_0916</i>  | -          | -          | -          | -          | -          | -          |
| <i>HVO_1631</i>  | ++         | ++         | ++         | ++         | -          | -          |
| <i>HVO_2477</i>  | ++         | ++         | ++         | ++         | -          | -          |
| <i>HVO_2493</i>  | ++         | ++         | ++         | ++         | -          | -          |
| <i>HVO_1105</i>  | ++         | ++         | ++         | ++         | -          | -          |
| <i>HVO_1105</i>  | ++         | ++         | ++         | +          | -          | -          |
| <i>HVO_2008</i>  |            |            |            |            |            |            |
| <i>HVO_2001</i>  | ++         | ++         | ++         | ++         | -          | -          |
| <i>HVO_2008</i>  | ++         | ++         | ++         | ++         | -          | -          |
| <i>HVO_1717</i>  | ++         | ++         | ++         | ++         | -          | -          |
| <i>HVO_1716</i>  | ++         | ++         | ++         | ++         | -          | -          |
| <i>HVO_0253</i>  | ++         | ++         | ++         | ++         | -          | -          |
| <i>HVO_1803</i>  | ++         | ++         | ++         | ++         | -          | -          |
| <i>HVO_B0354</i> | ++         | ++         | ++         | ++         | -          | -          |

|                 |    |    |    |    |   |   |
|-----------------|----|----|----|----|---|---|
| <i>HVO_1594</i> | ++ | ++ | ++ | ++ | - | - |
| <i>HVO_0390</i> | ++ | ++ | ++ | ++ | - | - |
| <i>HVO_2888</i> | ++ | ++ | ++ | ++ | - | - |
| <i>HVO_1378</i> | ++ | ++ | ++ | ++ | - | - |
| <i>HVO_1852</i> | ++ | ++ | ++ | ++ | - | - |
| <i>HVO_0658</i> | ++ | ++ | ++ | ++ | - | - |
| <i>HVO_2478</i> | ++ | ++ | ++ | ++ | - | - |
| <i>HVO_2736</i> | ++ | ++ | ++ | ++ | - | - |
| <i>HVO_1475</i> | ++ | ++ | ++ | ++ | - | - |
| <i>HVO_0236</i> | ++ | ++ | ++ | ++ | - | - |

37°C

| Strain                             | 12% | 14% | 16% | 18% | 23% | 25% |
|------------------------------------|-----|-----|-----|-----|-----|-----|
| <b>H26</b>                         | ++  | ++  | ++  | ++  | -   | -   |
| <i>HVO_0916</i>                    | -   | -   | -   | -   | -   | -   |
| <i>HVO_1631</i>                    | ++  | ++  | ++  | ++  | -   | -   |
| <i>HVO_2477</i>                    | ++  | ++  | ++  | ++  | -   | -   |
| <i>HVO_2493</i>                    | ++  | ++  | ++  | ++  | -   | -   |
| <i>HVO_1105</i>                    | ++  | ++  | ++  | ++  | -   | -   |
| <i>HVO_1105</i><br><i>HVO_2008</i> | ++  | ++  | ++  | +   | -   | -   |
| <i>HVO_2001</i>                    | ++  | ++  | ++  | ++  | -   | -   |
| <i>HVO_2008</i>                    | ++  | ++  | ++  | ++  | -   | -   |

|                  |    |    |    |    |   |   |
|------------------|----|----|----|----|---|---|
| <i>HVO_1717</i>  | ++ | ++ | ++ | ++ | - | - |
| <i>HVO_1716</i>  | ++ | ++ | ++ | ++ | - | - |
| <i>HVO_0253</i>  | ++ | ++ | ++ | ++ | - | - |
| <i>HVO_1803</i>  | ++ | ++ | ++ | ++ | - | - |
| <i>HVO_B0354</i> | ++ | ++ | ++ | ++ | - | - |
| <i>HVO_1594</i>  | ++ | ++ | ++ | ++ | - | - |
| <i>HVO_0390</i>  | ++ | ++ | ++ | ++ | - | - |
| <i>HVO_2888</i>  | ++ | ++ | ++ | ++ | - | - |
| <i>HVO_1378</i>  | ++ | ++ | ++ | ++ | - | - |
| <i>HVO_1852</i>  | ++ | ++ | ++ | ++ | - | - |
| <i>HVO_0658</i>  | ++ | ++ | ++ | ++ | - | - |
| <i>HVO_2478</i>  | ++ | ++ | ++ | ++ | - | - |
| <i>HVO_2736</i>  | ++ | ++ | ++ | ++ | - | - |
| <i>HVO_1475</i>  | ++ | ++ | ++ | ++ | - | - |
| <i>HVO_0236</i>  | ++ | ++ | ++ | ++ | - | - |

44°C

| <b>Strain</b>   | <b>12%</b> | <b>14%</b> | <b>16%</b> | <b>18%</b> | <b>23%</b> | <b>25%</b> |
|-----------------|------------|------------|------------|------------|------------|------------|
| <b>H26</b>      | ++         | ++         | ++         | ++         | ++         | +          |
| <i>HVO_0916</i> | +          | +          | ++         | ++         | +          | -          |
| <i>HVO_1631</i> | ++         | ++         | ++         | ++         | ++         | -          |
| <i>HVO_2477</i> | ++         | ++         | ++         | ++         | ++         | +          |
| <i>HVO_2493</i> | ++         | ++         | ++         | ++         | ++         | +          |

|                                    |    |    |    |    |    |   |
|------------------------------------|----|----|----|----|----|---|
| <i>HVO_1105</i>                    | ++ | ++ | ++ | ++ | ++ | + |
| <i>HVO_1105</i><br><i>HVO_2008</i> | ++ | ++ | ++ | ++ | ++ | + |
| <i>HVO_2001</i>                    | ++ | ++ | ++ | ++ | ++ | + |
| <i>HVO_2008</i>                    | ++ | ++ | ++ | ++ | ++ | + |
| <i>HVO_1717</i>                    | ++ | ++ | ++ | ++ | ++ | + |
| <i>HVO_1716</i>                    | ++ | ++ | ++ | ++ | ++ | + |
| <i>HVO_0253</i>                    | ++ | ++ | ++ | ++ | ++ | + |
| <i>HVO_1803</i>                    | ++ | ++ | ++ | ++ | ++ | + |
| <i>HVO_B0354</i>                   | ++ | ++ | ++ | ++ | ++ | + |
| <i>HVO_1594</i>                    | ++ | ++ | ++ | ++ | ++ | + |
| <i>HVO_0390</i>                    | ++ | ++ | ++ | ++ | ++ | + |
| <i>HVO_2888</i>                    | ++ | ++ | ++ | ++ | ++ | + |
| <i>HVO_1378</i>                    | ++ | ++ | ++ | ++ | ++ | + |
| <i>HVO_1852</i>                    | ++ | ++ | ++ | ++ | ++ | + |
| <i>HVO_0658</i>                    | ++ | ++ | ++ | ++ | ++ | + |
| <i>HVO_2478</i>                    | ++ | ++ | ++ | ++ | ++ | + |
| <i>HVO_2736</i>                    | ++ | ++ | ++ | ++ | ++ | + |
| <i>HVO_1475</i>                    | ++ | ++ | ++ | ++ | ++ | + |
| <i>HVO_0236</i>                    | ++ | ++ | ++ | ++ | ++ | + |

50°C

|               |            |            |            |            |            |            |
|---------------|------------|------------|------------|------------|------------|------------|
| <b>Strain</b> | <b>12%</b> | <b>14%</b> | <b>16%</b> | <b>18%</b> | <b>23%</b> | <b>25%</b> |
|---------------|------------|------------|------------|------------|------------|------------|

|                  |   |   |   |    |    |    |
|------------------|---|---|---|----|----|----|
| <b>H26</b>       | - | - | - | ++ | ++ | ++ |
| <i>HVO_0916</i>  | - | - | - | +  | +  | +  |
| <i>HVO_1631</i>  | - | - | - | ++ | ++ | ++ |
| <i>HVO_2477</i>  | - | - | - | ++ | ++ | ++ |
| <i>HVO_2493</i>  | - | - | - | ++ | ++ | ++ |
| <i>HVO_1105</i>  | - | - | - | ++ | ++ | ++ |
| <i>HVO_1105</i>  | - | - | - | ++ | ++ | ++ |
| <i>HVO_2008</i>  |   |   |   |    |    |    |
| <i>HVO_2001</i>  | - | - | - | ++ | ++ | ++ |
| <i>HVO_2008</i>  | - | - | - | ++ | ++ | ++ |
| <i>HVO_1717</i>  | - | - | - | ++ | ++ | ++ |
| <i>HVO_1716</i>  | - | - | - | ++ | ++ | ++ |
| <i>HVO_0253</i>  | - | - | - | ++ | ++ | ++ |
| <i>HVO_1803</i>  | - | - | - | ++ | ++ | ++ |
| <i>HVO_B0354</i> | - | - | - | ++ | ++ | ++ |
| <i>HVO_1594</i>  | - | - | - | ++ | ++ | ++ |
| <i>HVO_0390</i>  | - | - | - | ++ | ++ | ++ |
| <i>HVO_2888</i>  | - | - | - | ++ | ++ | ++ |
| <i>HVO_1378</i>  | - | - | - | ++ | ++ | ++ |
| <i>HVO_1852</i>  | - | - | - | ++ | ++ | ++ |
| <i>HVO_0658</i>  | - | - | - | ++ | ++ | ++ |
| <i>HVO_2478</i>  | - | - | - | ++ | ++ | ++ |
| <i>HVO_2736</i>  | - | - | - | ++ | ++ | ++ |

|                 |   |   |   |    |    |    |
|-----------------|---|---|---|----|----|----|
| <b>HVO_1475</b> | - | - | - | ++ | ++ | ++ |
| <b>HVO_0236</b> | - | - | - | ++ | ++ | ++ |

## References

1. **Allers, T., H. Ngo, M. Mevarech, and R. Lloyd.** 2004. Development of additional selectable markers for the halophilic archaeon *Haloferax volcanii* based on the *leuB* and *trpA* genes. *Appl Environ Microbiol* **70**:943-53.
2. **El Yacoubi, B., G. Phillips, I. Blaby, C. Haas, Y. Cruz, J. Greenberg, and V. de Crécy-Lagard.** 2009. A Gateway platform for functional genomics in *Haloferax volcanii*: deletion of three tRNA modification genes. *Archaea* **2**:211-9.
3. **Kaczowka, S., and J. Maupin-Furlow.** 2003. Subunit topology of two 20S proteasomes from *Haloferax volcanii*. *J Bacteriol* **185**:165-74.
4. **Phillips, G., V. Chikwana, A. Maxwell, B. El-Yacoubi, M. Swairjo, D. Iwata-Reuyl, and V. de Crécy-Lagard.** 2010. Discovery and characterization of an amidinotransferase involved in the modification of archaeal tRNA. *J Biol Chem* **285**:12706-13.
5. **Wendoloski, D., C. Ferrer, and M. Dyll-Smith.** 2001. A new simvastatin (mevinolin)-resistance marker from *Haloarcula hispanica* and a new *Haloferax volcanii* strain cured of plasmid pHV2. *Microbiology* **147**:959-64.
